# Supplementary material for: Lipophilicity and ADMET Analysis of Quinoline-1,4-quinone Hybrids
Source: MDPI journal article supplement (doi:10.3390/pharmaceutics15010034), 2022-12-22
Supplement: s1 [file s1]

## Lipophilicity and ADMET analysis of quinoline-1,4-quinone hybrids

Monika Kadela-Tomanek, Maria Jastrzębska, Elwira Chrobak, Ewa Bębenek

### Table of contents

|                                                                                                                                                                                                          |   |
|----------------------------------------------------------------------------------------------------------------------------------------------------------------------------------------------------------|---|
| <b>Figure S1.</b> The optimalization structure of compounds <b>1-24</b> .....                                                                                                                            | 2 |
| <b>Figure S2.</b> Docking pose of the BCL-2 protein complex with Venetoclax. ....                                                                                                                        | 3 |
| <b>Table S1.</b> Theoretical value of lipophilicity of compounds <b>1-24</b> .....                                                                                                                       | 4 |
| <b>Table S2.</b> Experimental ( $\log P_{\text{TLC}}$ ) and calculated by the multilinear regression (MLR) equation (5) ( $\log P_{\text{calc}}$ ) value of lipophilicity and absolute error.....        | 4 |
| <b>Table S3.</b> Experimental ( $\log \text{NQO1}$ ) and calculated by the multilinear regression (MLR) equation (5) ( $\log \text{NQO1}_{\text{calc}}$ ) value of lipophilicity and absolute error..... | 5 |
| <b>Table S4.</b> Interaction of 2-methyl-5,8-quinolinedione hybrids <b>7-12</b> with BCL-2 protein.....                                                                                                  | 6 |

**Figure S1.** The optimization structure of compounds 1-24.

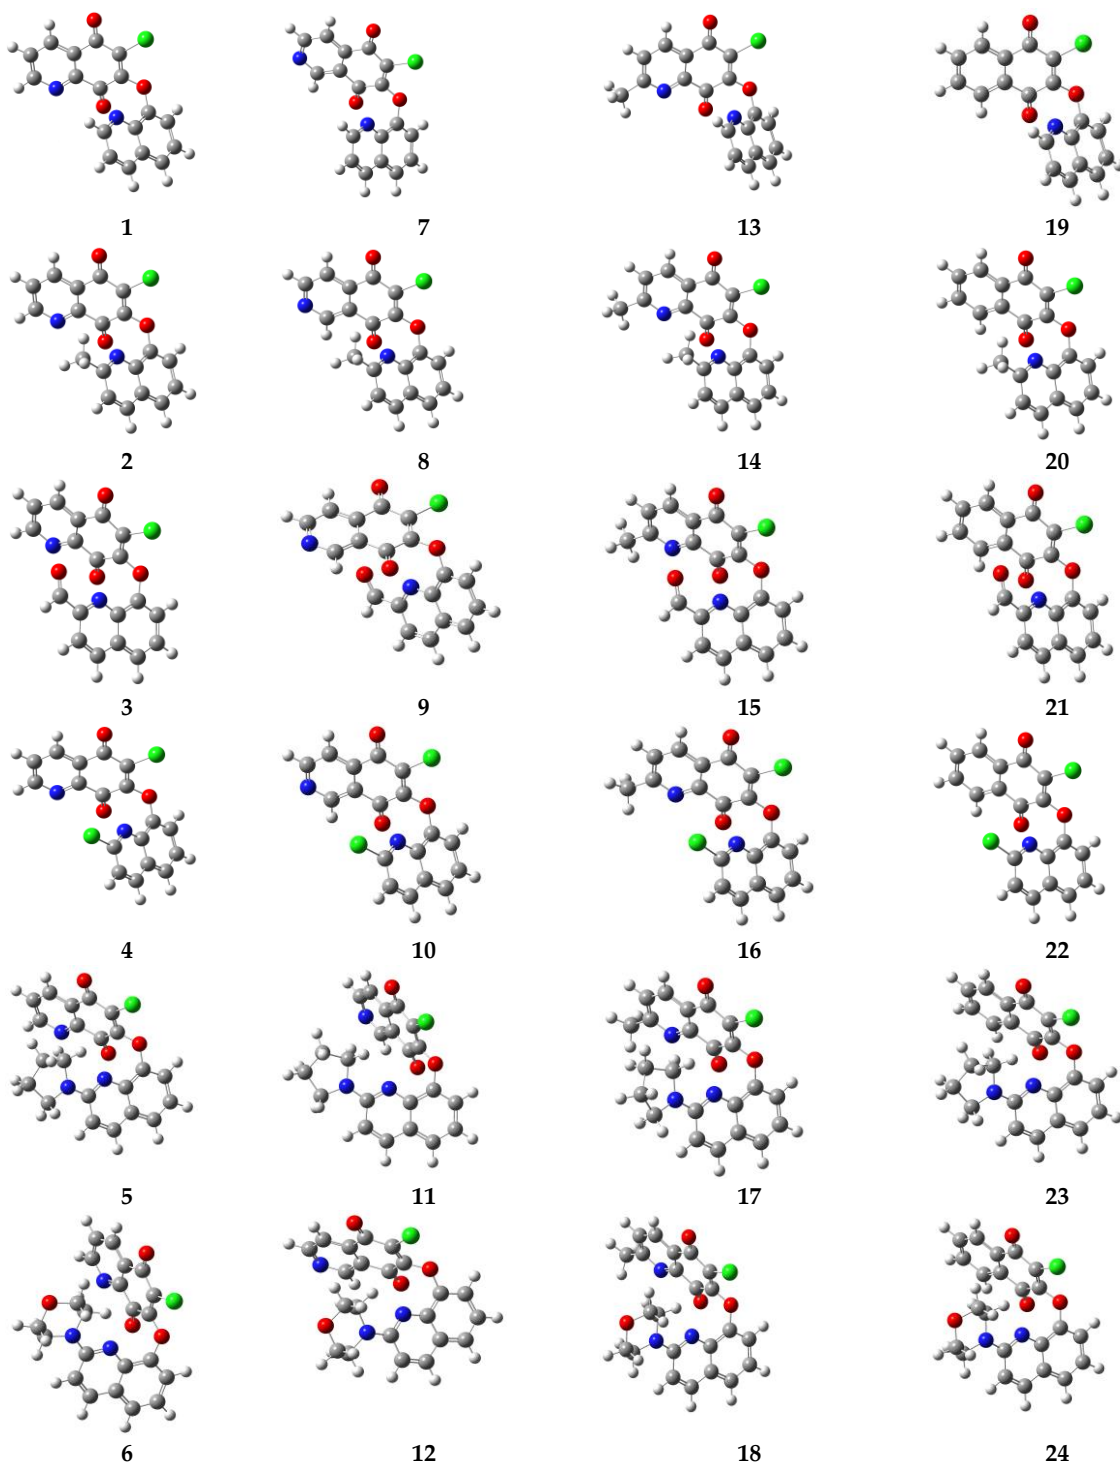

**Figure S2.** Docking pose of the BCL-2 protein complex with Venetoclax.

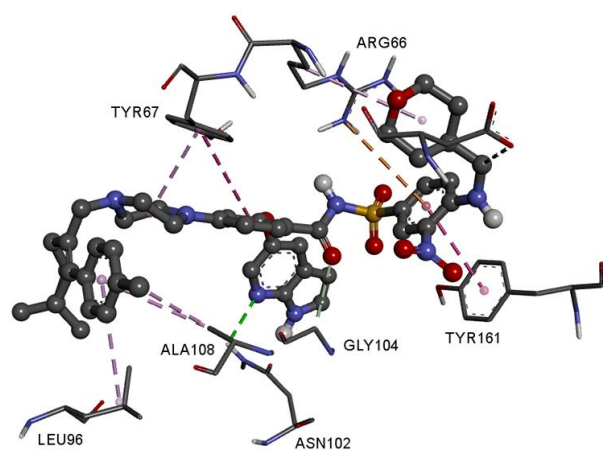

**Table S1.** Theoretical value of lipophilicity of compounds **1-24**.

| Compound | ILOGP | XLOGP3 | WLOGP | MLOGP | SILICOS-IT | milogP |
|----------|-------|--------|-------|-------|------------|--------|
| 1        | 1.87  | 3.56   | 3.54  | 0.80  | 3.85       | 2.17   |
| 2        | 2.18  | 3.96   | 3.85  | 1.03  | 4.36       | 2.22   |
| 3        | 1.55  | 3.35   | 3.35  | 0.14  | 4.05       | 2.03   |
| 4        | 2.10  | 4.52   | 4.19  | 1.30  | 4.49       | 3.19   |
| 5        | 2.30  | 4.50   | 3.76  | 1.55  | 4.14       | 3.02   |
| 6        | 2.45  | 3.64   | 2.99  | 0.75  | 3.73       | 2.46   |
| 7        | 2.23  | 3.22   | 3.54  | 0.80  | 3.85       | 2.82   |
| 8        | 2.39  | 3.62   | 3.85  | 1.03  | 4.36       | 2.87   |
| 9        | 1.65  | 3.02   | 3.35  | 0.14  | 4.05       | 2.68   |
| 10       | 2.24  | 4.18   | 4.19  | 1.30  | 4.49       | 3.84   |
| 11       | 2.49  | 4.17   | 3.76  | 1.55  | 4.14       | 3.66   |
| 12       | 2.37  | 3.31   | 2.99  | 0.75  | 3.73       | 3.11   |
| 13       | 2.15  | 3.96   | 3.85  | 1.03  | 4.36       | 2.22   |
| 14       | 2.43  | 4.36   | 4.16  | 1.25  | 4.87       | 2.28   |
| 15       | 1.65  | 3.75   | 3.66  | 0.37  | 4.57       | 2.08   |
| 16       | 2.43  | 4.92   | 4.5   | 1.52  | 5.00       | 3.24   |
| 17       | 2.81  | 4.90   | 4.07  | 1.76  | 4.66       | 3.07   |
| 18       | 2.72  | 4.04   | 3.30  | 0.96  | 4.25       | 2.51   |
| 19       | 2.32  | 4.29   | 4.14  | 1.86  | 4.41       | 3.91   |
| 20       | 2.69  | 4.69   | 4.45  | 2.08  | 4.92       | 3.97   |
| 21       | 2.02  | 4.09   | 3.96  | 1.18  | 4.61       | 3.77   |
| 22       | 2.68  | 5.25   | 4.8   | 2.35  | 5.04       | 4.93   |
| 23       | 2.88  | 5.24   | 4.36  | 2.57  | 4.71       | 4.76   |
| 24       | 2.62  | 4.38   | 3.60  | 1.76  | 4.30       | 4.20   |

**Table S2.** Experimental ( $\log P_{TLC}$ ) and calculated by the multilinear regression (MLR) equation (5) ( $\log P_{calc}$ ) value of lipophilicity and absolute error.

| Compound | $\log P_{TLC}$ | $\log P_{calc}$ | Error | Compound | $\log P_{TLC}$ | $\log P_{calc}$ | Error |
|----------|----------------|-----------------|-------|----------|----------------|-----------------|-------|
| 1        | 1.65           | 2.47            | 0.50  | 13       | 2.31           | 2.54            | 0.10  |
| 2        | 1.84           | 2.54            | 0.38  | 14       | 2.00           | 2.61            | 0.30  |
| 3        | 1.75           | 2.24            | 0.28  | 15       | 2.26           | 2.31            | 0.02  |
| 4        | 2.55           | 2.64            | 0.03  | 16       | 3.30           | 2.71            | 0.18  |
| 5        | 2.60           | 3.66            | 0.41  | 17       | 3.79           | 3.72            | 0.02  |
| 6        | 2.72           | 3.07            | 0.13  | 18       | 2.98           | 3.14            | 0.05  |
| 7        | 2.40           | 2.47            | 0.03  | 19       | 3.23           | 3.57            | 0.11  |
| 8        | 2.85           | 2.54            | 0.11  | 20       | 3.73           | 3.64            | 0.03  |
| 9        | 2.72           | 2.24            | 0.18  | 21       | 4.61           | 3.74            | 0.19  |
| 10       | 3.63           | 2.64            | 0.27  | 22       | 5.06           | 3.34            | 0.34  |
| 11       | 3.15           | 3.66            | 0.16  | 23       | 4.16           | 4.75            | 0.14  |
| 12       | 3.68           | 3.07            | 0.17  | 24       | 4.50           | 4.17            | 0.07  |

**Table S3.** Experimental (logNQO1) and calculated by the multilinear regression (MLR) equation (5) (logNQO1<sub>calc</sub>) value of lipophilicity and absolute error.

| Compound  | logNQO1 | logNQO1 <sub>cal</sub> | Error | Compound  | logNQO1 | logNQO1 <sub>cal</sub> | Error |
|-----------|---------|------------------------|-------|-----------|---------|------------------------|-------|
| <b>1</b>  | 3.146   | 2.933                  | 0.07  | <b>13</b> | 3.178   | 2.926                  | 0.08  |
| <b>2</b>  | 3.112   | 2.900                  | 0.07  | <b>14</b> | 3.157   | 2.897                  | 0.08  |
| <b>3</b>  | 3.041   | 3.010                  | 0.01  | <b>15</b> | 2.672   | 2.993                  | 0.12  |
| <b>4</b>  | 2.903   | 3.014                  | 0.04  | <b>16</b> | 2.949   | 3.007                  | 0.02  |
| <b>5</b>  | 3.034   | 2.422                  | 0.20  | <b>17</b> | 2.778   | 2.446                  | 0.12  |
| <b>6</b>  | 2.053   | 2.464                  | 0.20  | <b>18</b> | 2.322   | 2.500                  | 0.08  |
| <b>7</b>  | 3.083   | 2.930                  | 0.05  | <b>19</b> | 3.108   | 2.929                  | 0.06  |
| <b>8</b>  | 3.058   | 2.888                  | 0.06  | <b>20</b> | 3.100   | 2.899                  | 0.06  |
| <b>9</b>  | 2.502   | 2.967                  | 0.19  | <b>21</b> | 2.740   | 2.986                  | 0.09  |
| <b>10</b> | 2.801   | 2.956                  | 0.06  | <b>22</b> | 3.000   | 3.008                  | 0.01  |
| <b>11</b> | 2.330   | 2.307                  | 0.01  | <b>23</b> | 2.549   | 2.492                  | 0.02  |
| <b>12</b> | 2.155   | 2.323                  | 0.08  | <b>24</b> | 1.940   | 2.521                  | 0.30  |

**Table S4.** Interaction of 2-methyl-5,8-quinolinedione hybrids **7-12** with BCL-2 protein.

| Ligand | 2-methyl-5,8-quinolinedione moiety |                     |                | Quinoline scaffold |                  |                |
|--------|------------------------------------|---------------------|----------------|--------------------|------------------|----------------|
|        | Residue                            | Type                | Distance       | Residue            | Type             | Distance       |
| 7      | Phe63                              | Pi-alkyl            | 4.972          | Ala59              | Pi-alkyl         | 4.476          |
|        |                                    |                     |                |                    |                  | 4.788          |
|        | Gly104                             | Amide-Pi<br>Stacked | 4.406<br>3.868 | Val107             | Pi-alkyl         | 5.136          |
|        | Arg105                             | Pi-Alkyl            | 4.896          | Tyr161             | Pi-Pi<br>Stacked | 4.081<br>5.058 |
|        | Ala108                             | Alkyl               | 3.787          |                    |                  |                |
| 8      | Phe63                              | Pi-alkyl            | 5.015          | Ala59              | Pi-alkyl         | 4.468          |
|        |                                    |                     |                |                    |                  | 4.651          |
|        | Gly104                             | Amide-Pi<br>Stacked | 4.393<br>3.394 | Val107             | Pi-alkyl         | 5.091          |
|        | Arg105                             | Pi-Alkyl            | 4.852          | Tyr161             | Pi-Pi<br>Stacked | 4.099<br>5.088 |
|        | Ala108                             | Pi-Alkyl            | 3.728<br>5.418 |                    |                  |                |
| 9      | Phe63                              | Pi-alkyl            | 4.986          | Ala59              | Pi-alkyl         | 4.459          |
|        |                                    |                     |                |                    |                  | 4.668          |
|        | Gly104                             | Amide-Pi<br>Stacked | 4.361<br>3.850 | Val107             | Pi-alkyl         | 5.074          |
|        | Arg105                             | Pi-Alkyl            | 4.865          | Tyr161             | Pi-Pi<br>Stacked | 4.082<br>5.002 |
|        | Ala108                             | Alkyl               | 3.765<br>5.410 |                    |                  |                |
| 10     | Phe63                              | Pi-alkyl            | 5.004          | Ala59              | Pi-alkyl         | 4.460          |
|        |                                    |                     |                |                    |                  | 4.633          |
|        | Gly104                             | Amide-Pi<br>Stacked | 4.386<br>3.833 | Val107             | Pi-alkyl         | 5.072          |
|        | Arg105                             | Pi-Alkyl            | 4.852          | Tyr161             | Pi-Pi<br>Stacked | 4.086<br>5.048 |
|        | Ala108                             | Alkyl               | 3.721<br>5.818 |                    |                  |                |
| 11     | Phe63                              | Pi-Alkyl            | 5.257          | Ala59              | Pi-Alkyl         | 4.573          |
|        |                                    |                     |                |                    |                  | 4.387          |
|        | Leu96                              | Alkyl               | 5.322          | Arg66              | Alkyl            | 5.441          |
|        | Arg105                             | Alkyl<br>Pi-Alkyl   | 4.616<br>4.821 | Val107             | Pi-Alkyl         | 5.020          |
|        | Ala108                             | Alkyl<br>Pi-Alkyl   | 3.686<br>5.426 | Tyr161             | Pi-Pi<br>Stacked | 4.098<br>5.034 |
| 12     | Phe63                              | Pi-Alkyl            | 4.899          | Ala59              | Pi-Alkyl         | 4.694          |
|        |                                    |                     |                |                    |                  | 4.381          |
|        | Tyr67                              | Pi-Sigma            | 3.820          | Arg66              | H-bond           | 2.527          |
|        |                                    |                     |                | Val107             | Pi-Alkyl         | 4.987          |
|        |                                    |                     |                | Tyr161             | Pi-Pi<br>Stacked | 3.841<br>4.702 |
